# Supplementary material for: Association between drought-related indices and the Number of Deaths in the Desert Adjacent Areas of Western China: A Time Series Study Based on Ecological Vulnerability Assessment
Source: Research Square preprint supplement (doi:10.21203/rs.3.rs-8671455/v1), 2026-02-01
Supplement: Supplementary file 1 [file 661b5175f3a46250eb6f7396.docx]

Appendix A.  Supplementary data

The following is the Supplementary data to this article:

Table s1. EVI-Based Ecological Vulnerability Classification Standards and Ecological Characteristics for Wuwei City.

| Vulnerability Level | EVI Range | Level | Feature Description |
| --- | --- | --- | --- |
| Potential | EVI≤0. 3766 | 1 | The ecological environment is stable, and the ecosystem structure is intact. |
| Slightly | 0. 3766<EVI≤ 0. 4198 | 2 | The ecological environment is relatively stable, and the ecosystem structure is relatively intact. |
| Mild | 0. 4198<EVI≤0. 4566 | 3 | The ecosystem can maintain its basic functions. |
| Moderate | 0. 4566<EVI≤0. 4832 | 4 | The ecosystem structure is severely damaged but remains within tolerable limits. |
| Severe | EVI>0. 4832 | 5 | The ecological environment is highly unstable, with an incomplete ecosystem structure that is extremely difficult to restore once damaged. |

Table s2. Factor Weighting for Ecological Vulnerability Indicators in Wuwei City, 2014–2023.

| Indicator | w1j | 2014 | | 2015 | | 2016 | | 2017 | | 2018 | |
| --- | --- | --- | --- | --- | --- | --- | --- | --- | --- | --- | --- |
| w2j | wj | w2j | wj | w2j | wj | w2j | wj | w2j | wj |
| Slope | 0. 0323 | 0. 0815 | 0. 0531 | 0. 0761 | 0. 0509 | 0. 0753 | 0. 0506 | 0. 0755 | 0. 0507 | 0. 0789 | 0. 0521 |
| elevation | 0. 0383 | 0. 0938 | 0. 0620 | 0. 0900 | 0. 0603 | 0. 0885 | 0. 0598 | 0. 0893 | 0. 0600 | 0. 0925 | 0. 0615 |
| Annual precipitation | 0. 0630 | 0. 0923 | 0. 0789 | 0. 0879 | 0. 0764 | 0. 0876 | 0. 0762 | 0. 0864 | 0. 0757 | 0. 0907 | 0. 0781 |
| Annual average temperature | 0. 0519 | 0. 0934 | 0. 0720 | 0. 0914 | 0. 0707 | 0. 0890 | 0. 0698 | 0. 0907 | 0. 0704 | 0. 0929 | 0. 0717 |
| Dryness | 0. 0603 | 0. 0866 | 0. 0748 | 0. 0805 | 0. 0716 | 0. 0824 | 0. 0723 | 0. 0822 | 0. 0723 | 0. 0856 | 0. 0742 |
| Vegetation cover | 0. 1110 | 0. 0883 | 0. 1024 | 0. 0880 | 0. 1015 | 0. 0896 | 0. 1024 | 0. 0871 | 0. 1009 | 0. 0882 | 0. 1022 |
| Soil Erosion Level | 0. 0603 | 0. 0579 | 0. 0611 | 0. 0659 | 0. 0647 | 0. 0738 | 0. 0685 | 0. 0678 | 0. 0656 | 0. 0660 | 0. 0651 |
| Landscape fragmentation | 0. 0903 | 0. 0264 | 0. 0505 | 0. 0433 | 0. 0642 | 0. 0476 | 0. 0673 | 0. 0454 | 0. 0657 | 0. 0295 | 0. 0533 |
| Landscape Diversity | 0. 0838 | 0. 0745 | 0. 0818 | 0. 0704 | 0. 0789 | 0. 0694 | 0. 0783 | 0. 0711 | 0. 0792 | 0. 0696 | 0. 0789 |
| Biological abundance | 0. 1430 | 0. 0872 | 0. 1155 | 0. 0840 | 0. 1126 | 0. 0832 | 0. 1120 | 0. 0845 | 0. 1128 | 0. 0867 | 0. 1150 |
| Net primary productivity of vegetation | 0. 0951 | 0. 0834 | 0. 0922 | 0. 0894 | 0. 0947 | 0. 0875 | 0. 0936 | 0. 0879 | 0. 0938 | 0. 0837 | 0. 0921 |
| Population density | 0. 1127 | 0. 0718 | 0. 0931 | 0. 0705 | 0. 0915 | 0. 0673 | 0. 0894 | 0. 0702 | 0. 0913 | 0. 0720 | 0. 0930 |
| GDP density | 0. 0580 | 0. 0630 | 0. 0625 | 0. 0626 | 0. 0619 | 0. 0588 | 0. 0599 | 0. 0619 | 0. 0615 | 0. 0637 | 0. 0628 |

Table s2. (Continued) Weighting Factors for Ecological Vulnerability Indicators in Wuwei City, 2014–2023.

| Indicator | w1j | 2019 | | 2020 | | 2021 | | 2022 | | 2023 | |
| --- | --- | --- | --- | --- | --- | --- | --- | --- | --- | --- | --- |
| w2j | wj | w2j | wj | w2j | wj | w2j | wj | w2j | wj |
| Slope | 0. 0323 | 0. 0765 | 0. 0516 | 0. 0810 | 0. 0529 | 0. 0779 | 0. 0520 | 0. 0796 | 0. 0525 | 0. 0795 | 0. 0524 |
| elevation | 0. 0383 | 0. 0936 | 0. 0622 | 0. 0934 | 0. 0619 | 0. 0939 | 0. 0622 | 0. 0933 | 0. 0619 | 0. 0922 | 0. 0615 |
| Annual precipitation | 0. 0630 | 0. 0913 | 0. 0787 | 0. 0914 | 0. 0785 | 0. 0909 | 0. 0785 | 0. 0911 | 0. 0784 | 0. 0906 | 0. 0782 |
| Annual average temperature | 0. 0519 | 0. 0952 | 0. 0730 | 0. 0931 | 0. 0719 | 0. 0952 | 0. 0729 | 0. 0939 | 0. 0723 | 0. 0940 | 0. 0723 |
| Dryness | 0. 0603 | 0. 0844 | 0. 0741 | 0. 0855 | 0. 0743 | 0. 0843 | 0. 0739 | 0. 0828 | 0. 0732 | 0. 0811 | 0. 0724 |
| Vegetation cover | 0. 1110 | 0. 0900 | 0. 1038 | 0. 0879 | 0. 1022 | 0. 0883 | 0. 1027 | 0. 0883 | 0. 1025 | 0. 0861 | 0. 1012 |
| Soil Erosion Level | 0. 0603 | 0. 0671 | 0. 0660 | 0. 0637 | 0. 0641 | 0. 0628 | 0. 0638 | 0. 0659 | 0. 0653 | 0. 0735 | 0. 0689 |
| Landscape fragmentation | 0. 0903 | 0. 0186 | 0. 0425 | 0. 0259 | 0. 0501 | 0. 0211 | 0. 0453 | 0. 0240 | 0. 0482 | 0. 0261 | 0. 0502 |
| Landscape Diversity | 0. 0838 | 0. 0634 | 0. 0757 | 0. 0677 | 0. 0780 | 0. 0649 | 0. 0765 | 0. 0688 | 0. 0786 | 0. 0706 | 0. 0796 |
| Biological abundance | 0. 1430 | 0. 0875 | 0. 1161 | 0. 0867 | 0. 1153 | 0. 0878 | 0. 1162 | 0. 0876 | 0. 1159 | 0. 0858 | 0. 1146 |
| Net primary productivity of vegetation | 0. 0951 | 0. 0894 | 0. 0957 | 0. 0860 | 0. 0936 | 0. 0887 | 0. 0953 | 0. 0863 | 0. 0938 | 0. 0836 | 0. 0923 |
| Population density | 0. 1127 | 0. 0752 | 0. 0956 | 0. 0716 | 0. 0930 | 0. 0739 | 0. 0946 | 0. 0711 | 0. 0927 | 0. 0698 | 0. 0918 |
| GDP density | 0. 0580 | 0. 0679 | 0. 0651 | 0. 0661 | 0. 0641 | 0. 0700 | 0. 0661 | 0. 0672 | 0. 0646 | 0. 0671 | 0. 0646 |


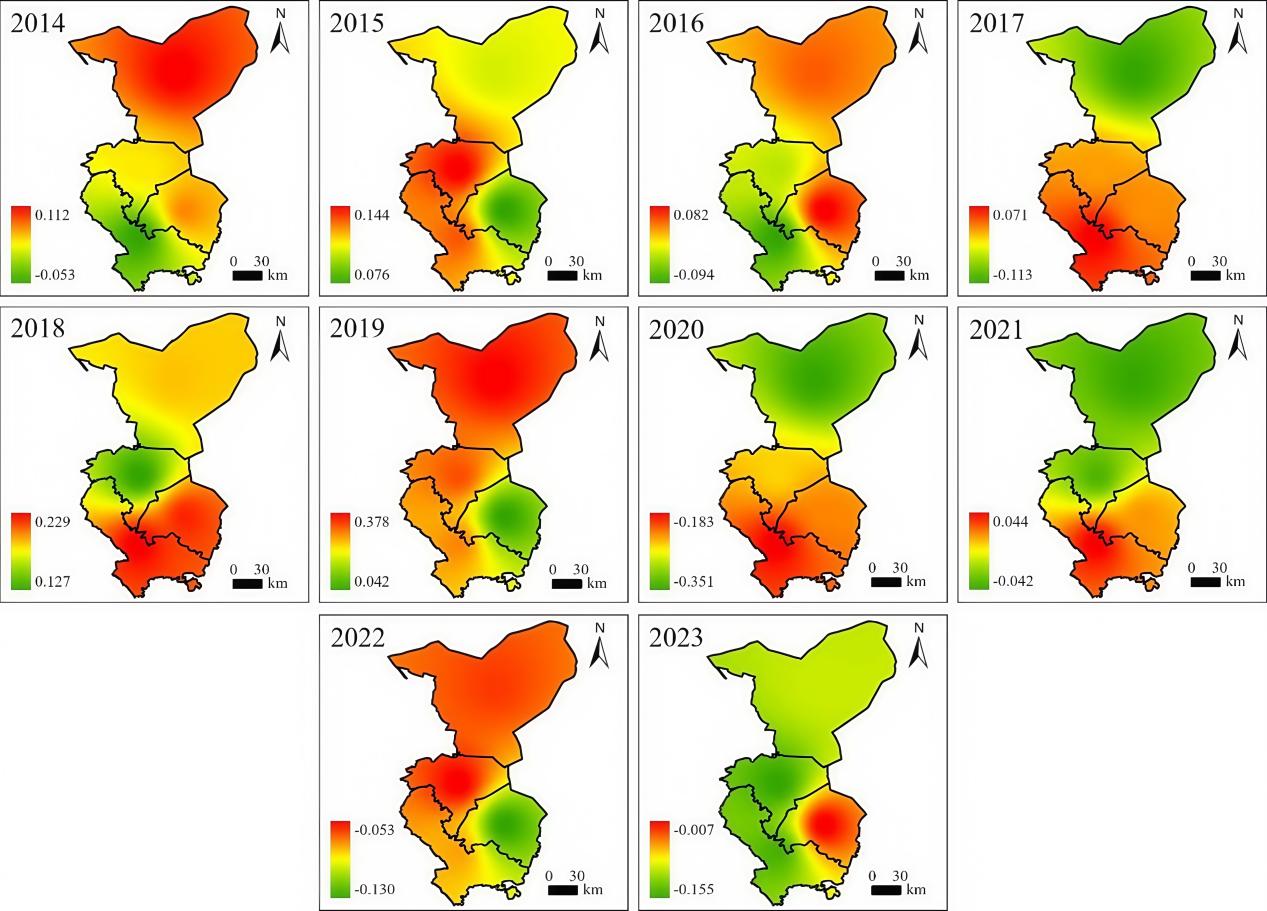


Fig. s1. Spatial Distribution of Annual Average SPI in Wuwei City, 2014–2023 Figure 12: Spatial Distribution of Annual SPI in Wuwei City, 2014-2023.


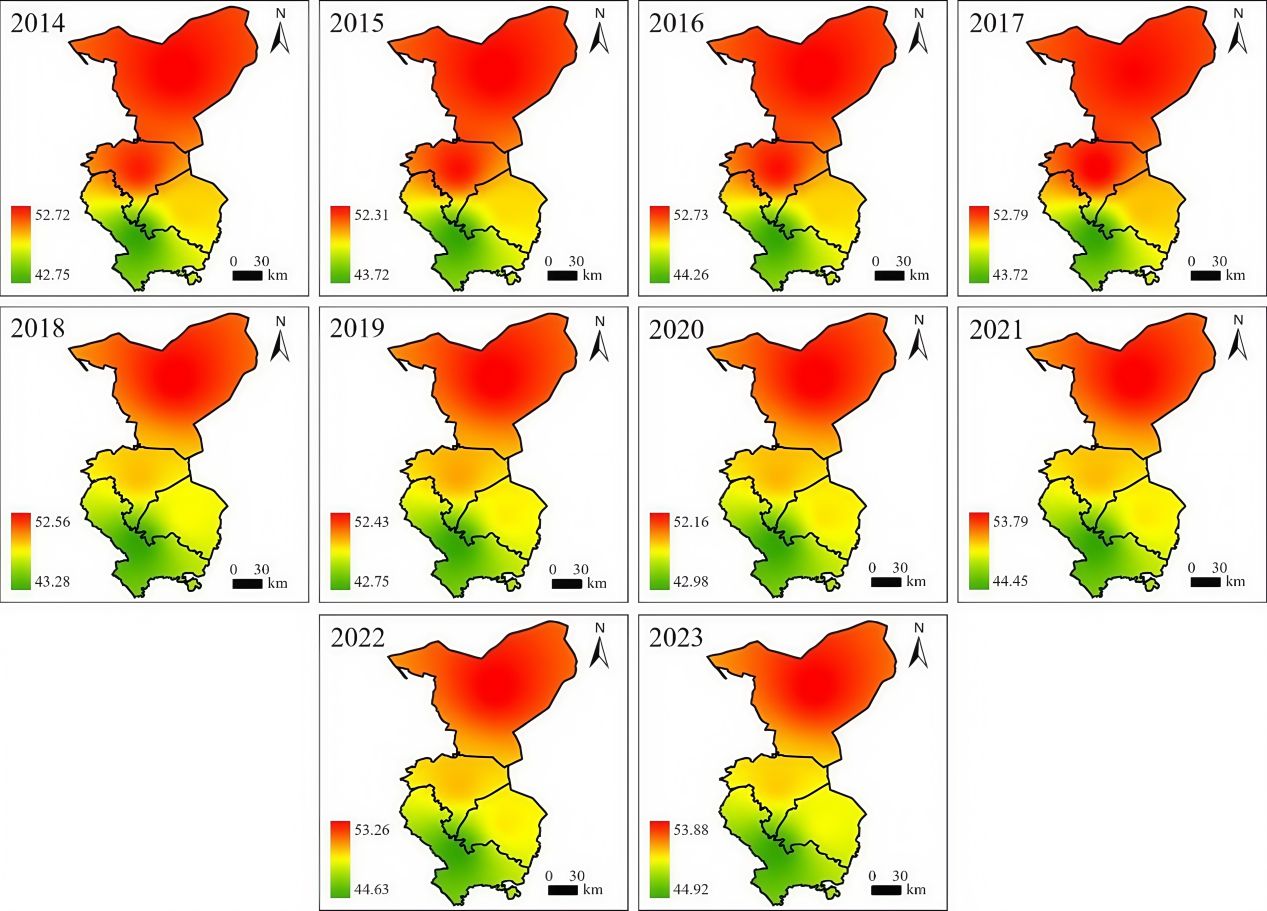


Fig. s2. Spatial Distribution of Annual Mean THI in Wuwei City, 2014-2023.


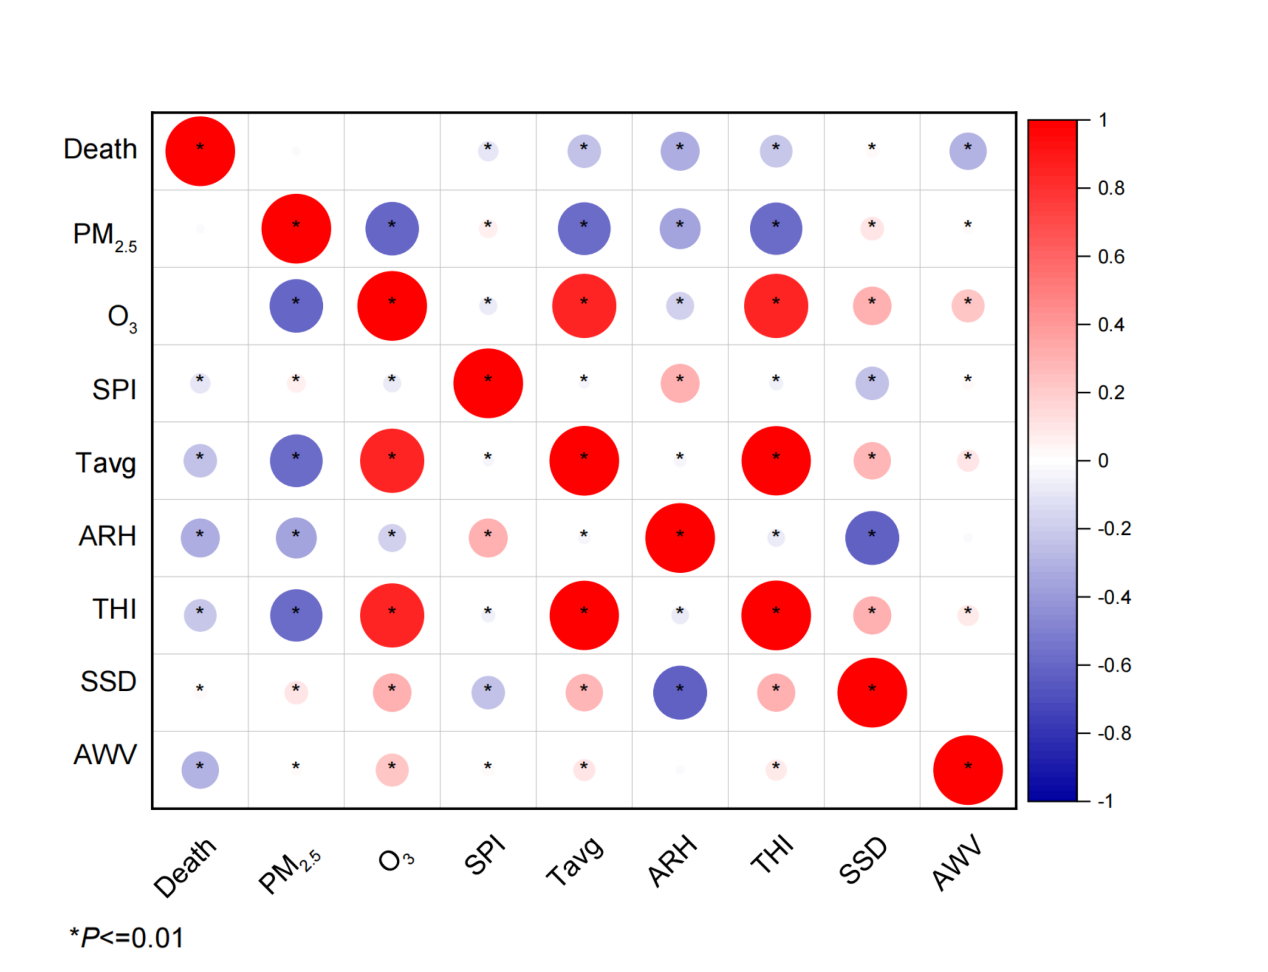


Fig. s3. Heatmap of Correlation Between Mortality Rates in the Study Population of Wuwei City and Pollutants and Meteorological Factors, 2014–2023 Figure 3 Correlation Heat Map of Mortality Rates in the Study Population of Wuwei City with Pollutants and Meteorological Factors, 2014–2023.


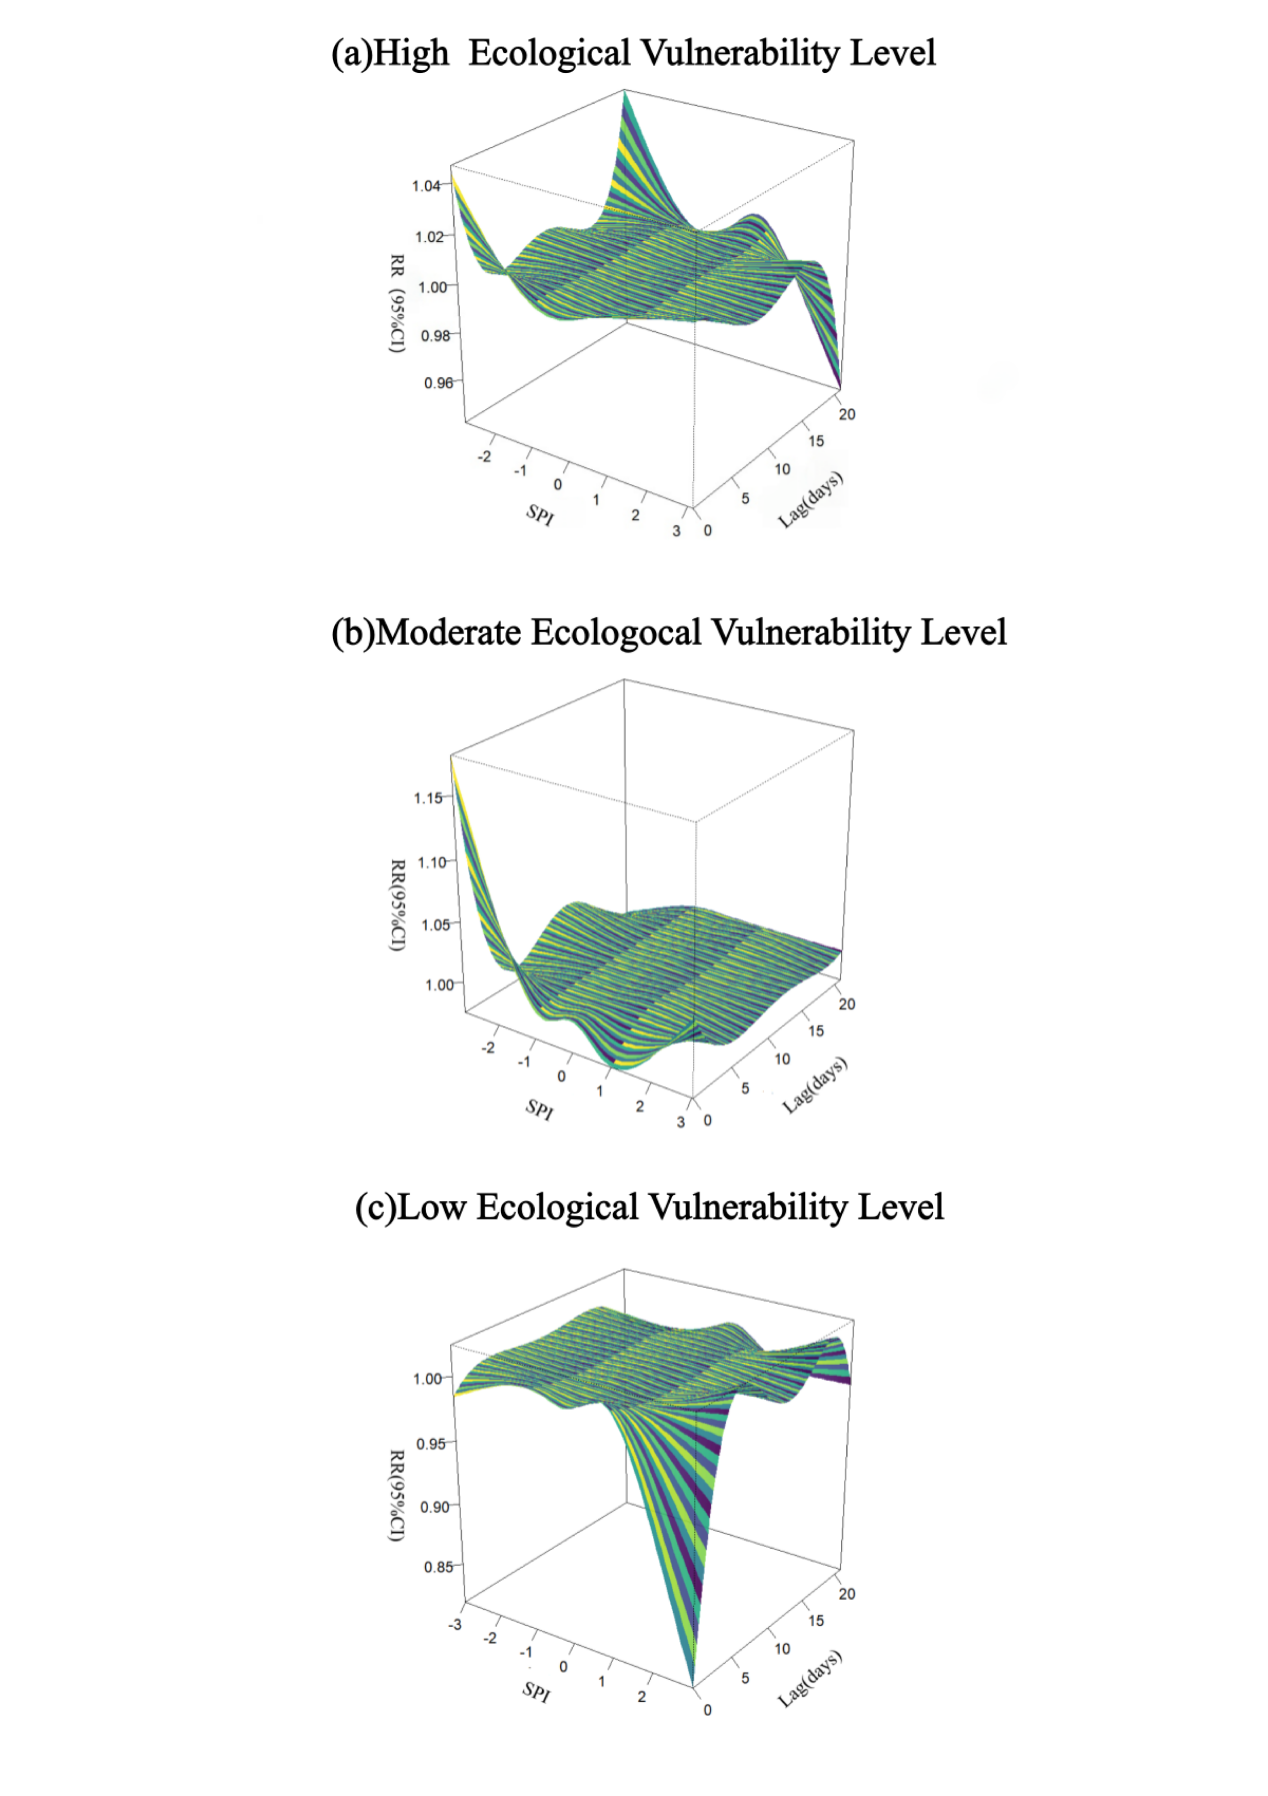
Fig. s4. 3D visualization of SPI impacts on population mortality across high, medium, and low ecological vulnerability levels.


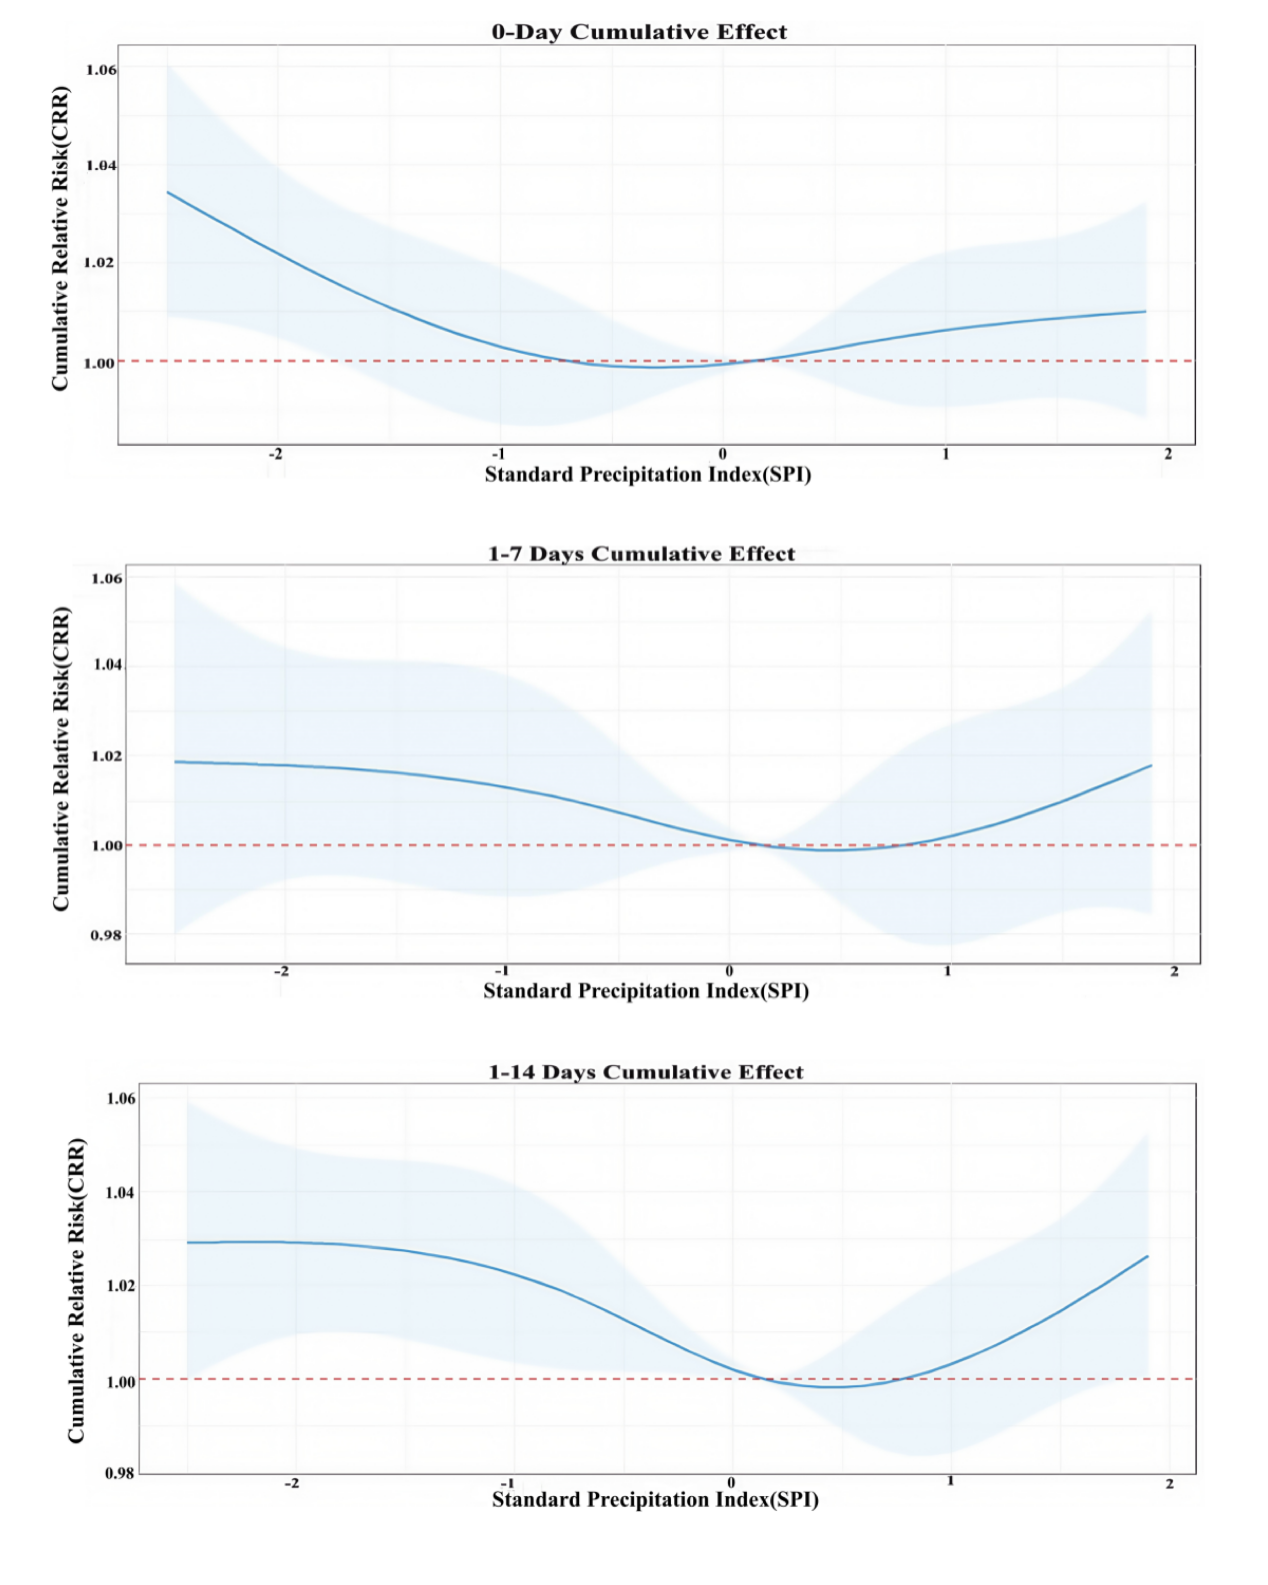
Fig. s5. Cumulative lag effect diagram of SPI on population mortality in high ecological vulnerability levels.


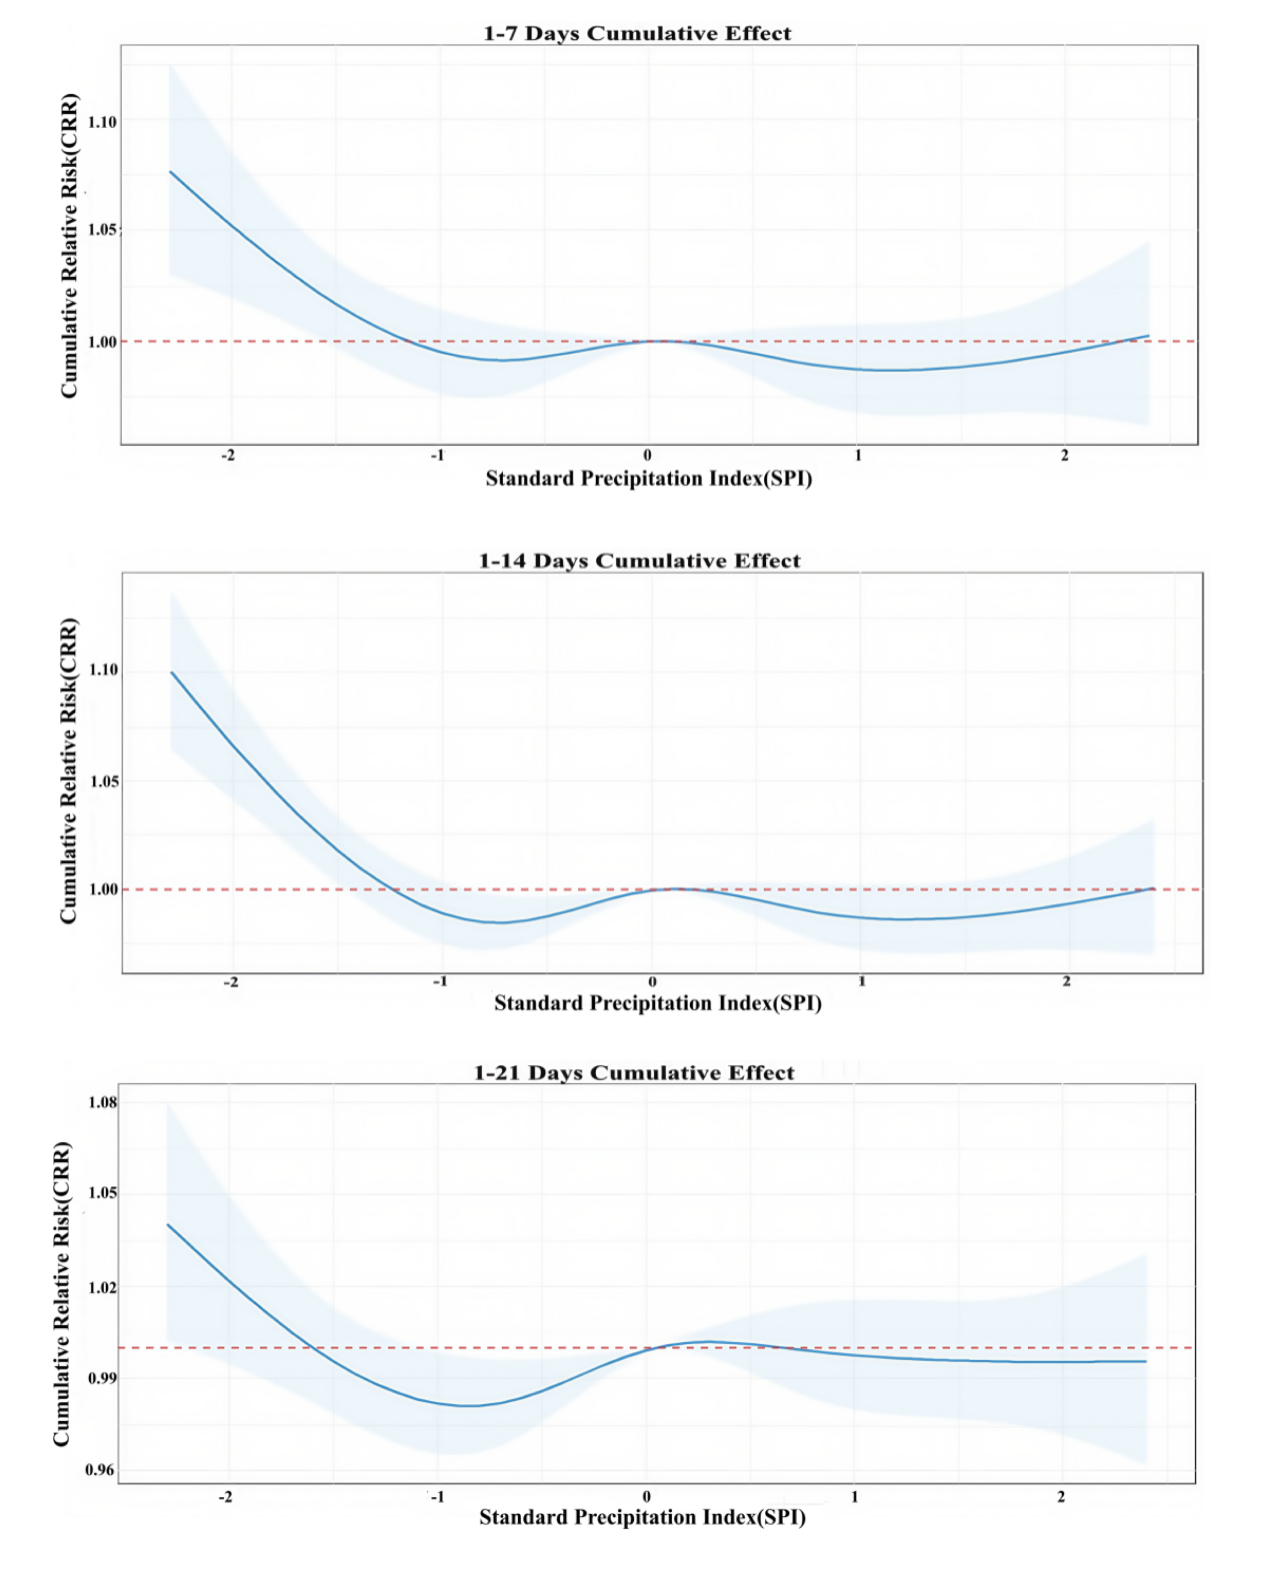


Fig. s6. Cumulative lag effect diagram of SPI on population mortality in medium ecological vulnerability levels.


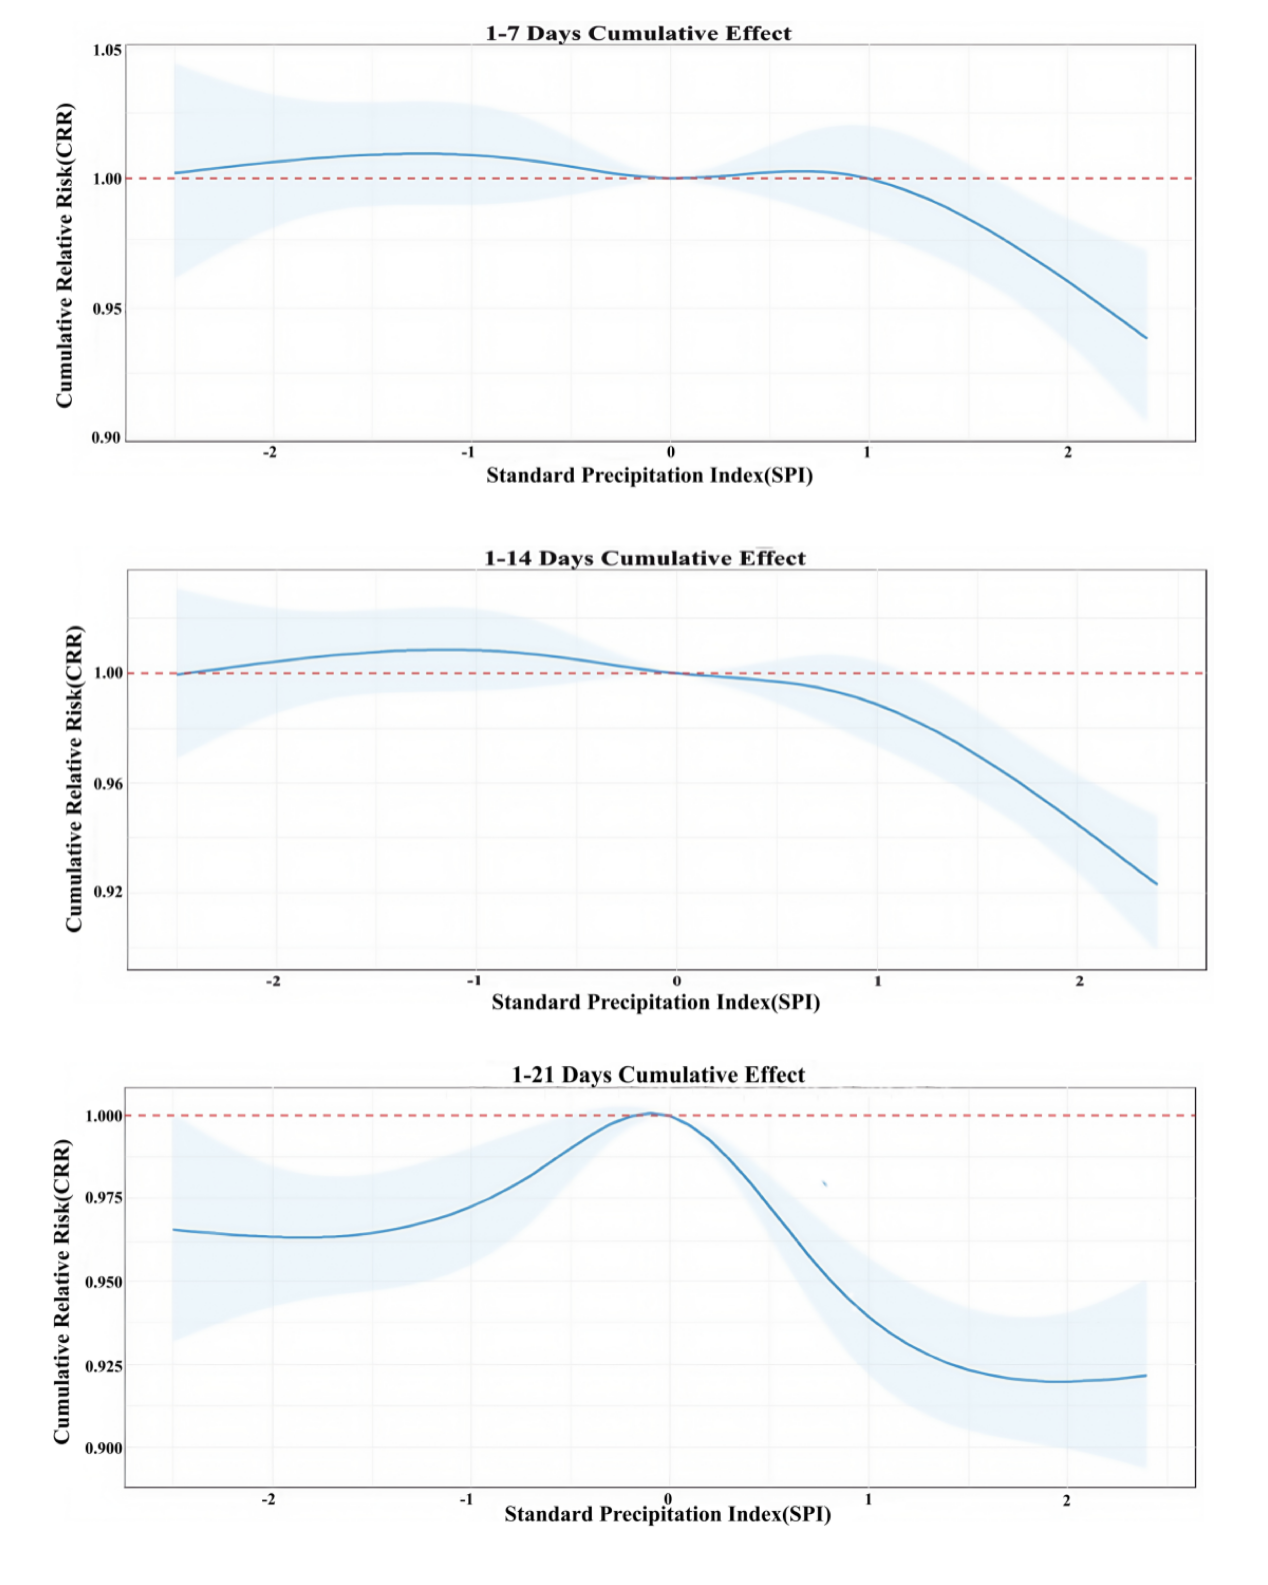


Fig. s7. Cumulative lag effect diagram of SPI on population mortality in low ecological vulnerability levels.


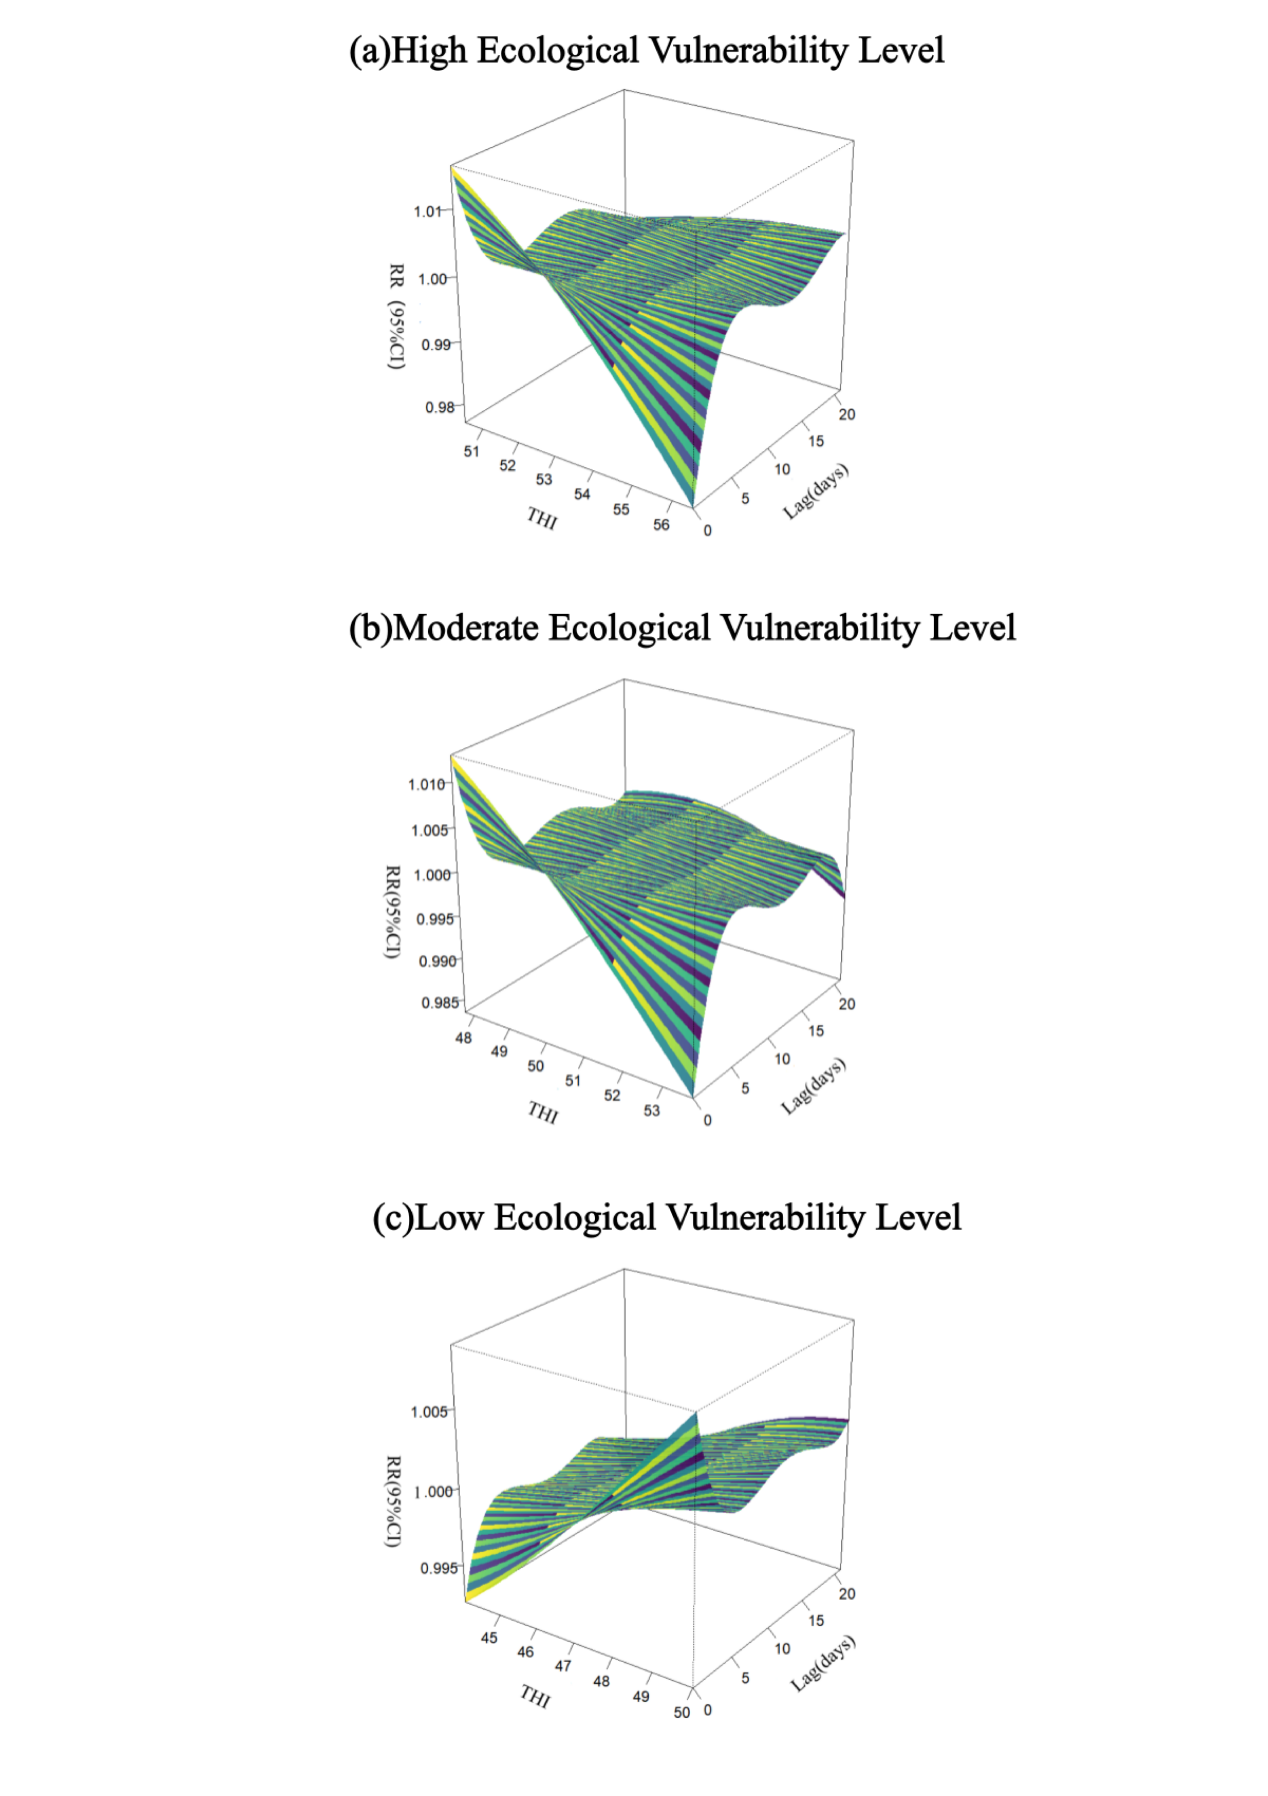


Fig. s8. 3D visualization of THI effects on mortality across high, medium, and low ecological vulnerability levels.


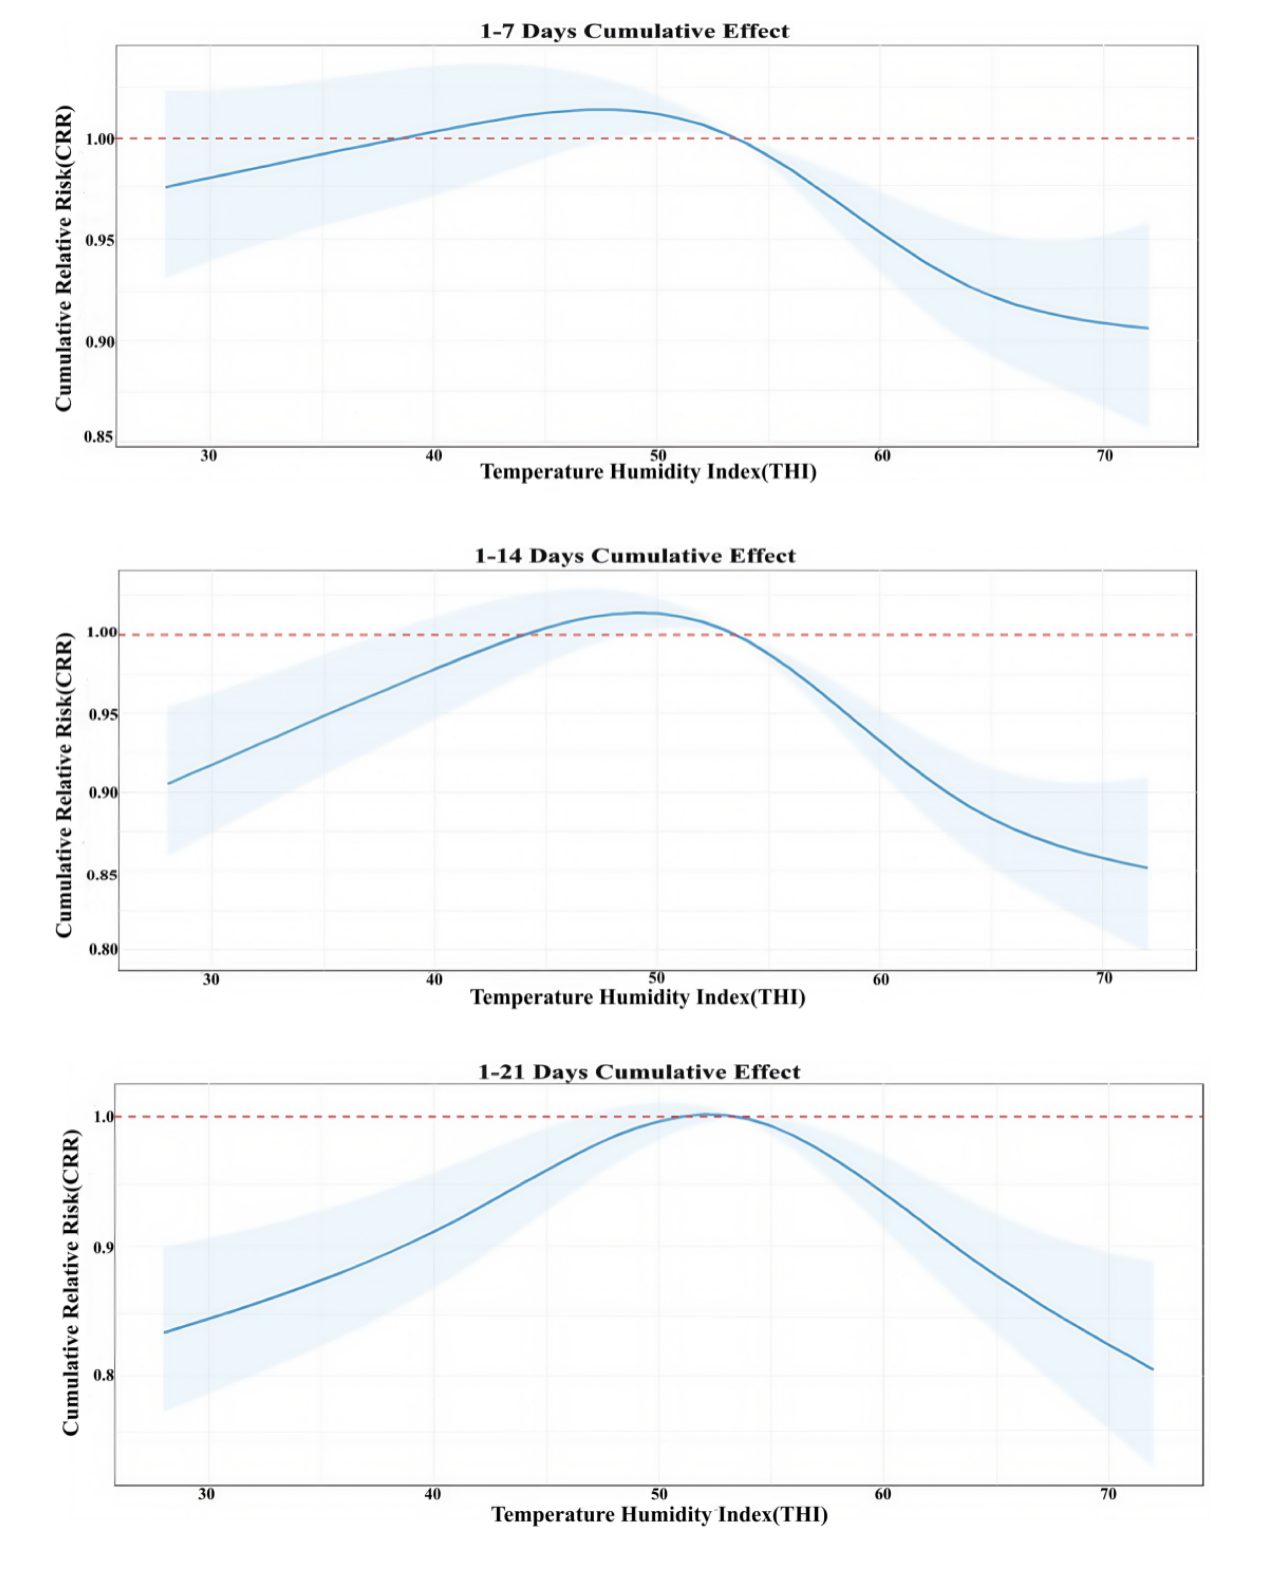


Fig. s9. Cumulative lag effect diagram of THI on mortality in high ecological vulnerability level.


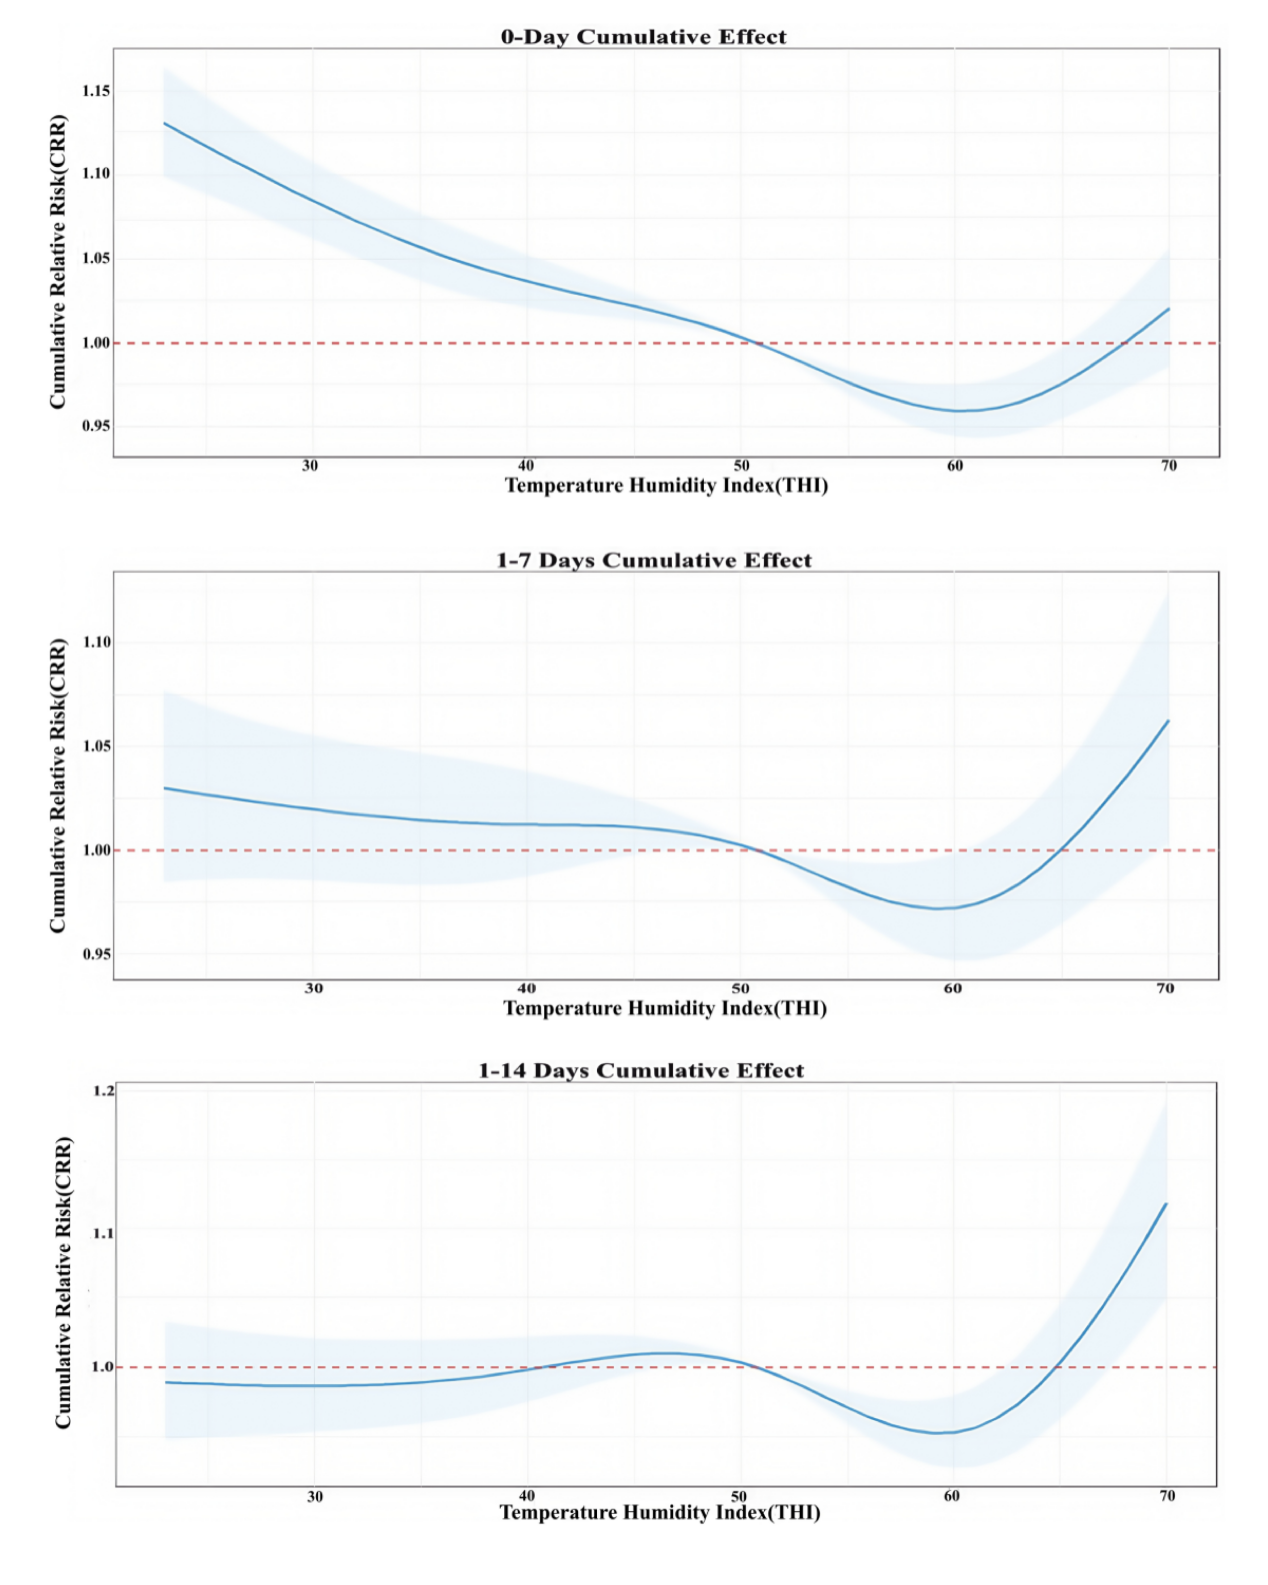


Fig. s10. Cumulative lag effect diagram of THI on mortality in medium ecological vulnerability level.


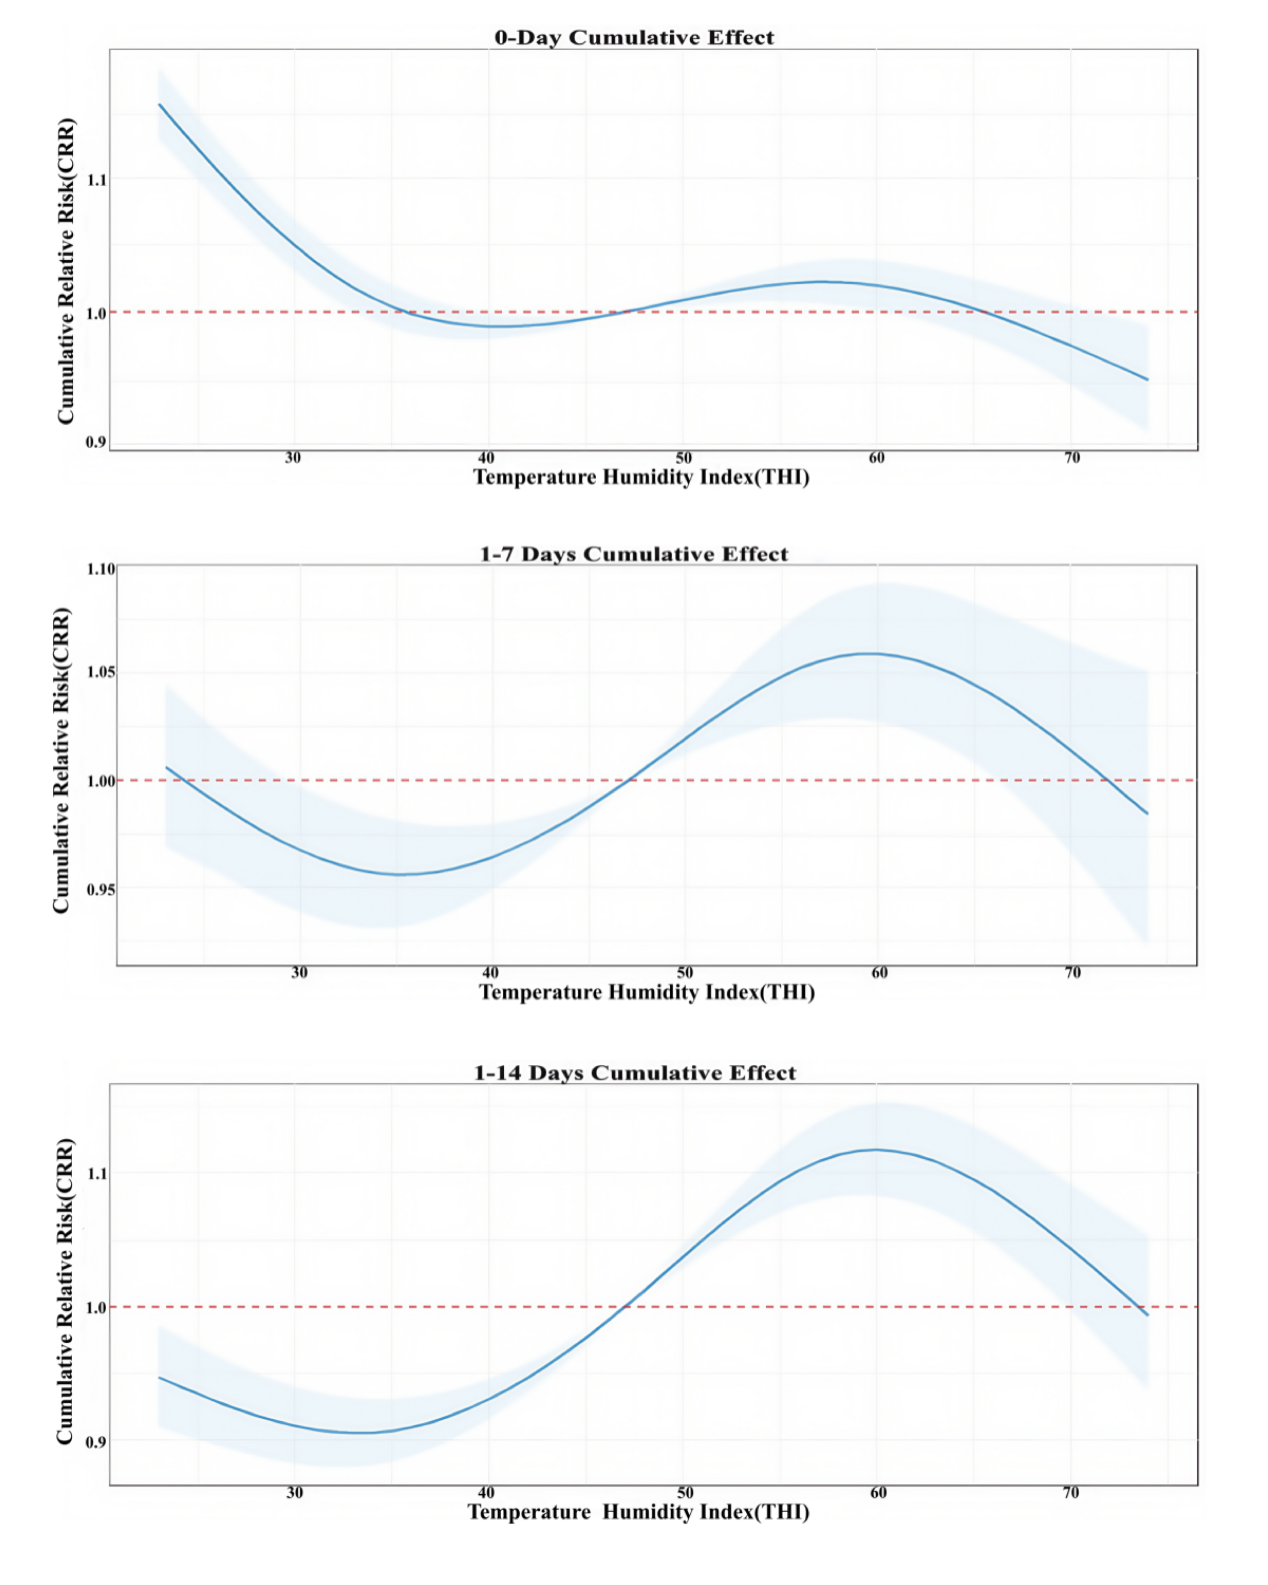


Fig. s11. Cumulative lag effect diagram of THI on mortality in low ecological vulnerability level.
